# Supplementary material for: Combination prevention and HIV: a cross-sectional community survey of gay and bisexual men in London, October to December 2016
Source: PubMed Central journal article supplement (PMC6593902; doi:10.2807/1560-7917.es.2019.24.25.1800312), 2019-06-20
Supplement: 1800312_LOGAN_Supplement.pdf [file 1800312_LOGAN_Supplement.pdf]

This supplementary material is hosted by *Eurosurveillance* as supporting information alongside the article 'Combination prevention and HIV: a cross-sectional community survey of gay and bisexual men in London, October to December 2016' on behalf of the authors who remain responsible for the accuracy and appropriateness of the content. The same standards for ethics, copyright, attributions and permissions as for the article apply. *Eurosurveillance* is not responsible for the maintenance of any links or email addresses provided therein.

**24 In the last year, have you used any of the following drugs just before or during sex?: (tick all that apply)**

- Amphetamine (speed)
- Cocaine
- Ketamine (Vitamin K, K, Special K)
- GHB/GBL (Gina, Liquid Ecstasy, Liquid G)
- Mephedrone (Drone, MCAT, meow meow)
- Meth Amphetamine (Crystal meth, ice/glass, Tina)
- Poppers (Amyl or other nitrite inhalants)
- Others (please specify) .....
- Don't know
- None of the above

**25 In the last year, did you inject any of these drugs?**

- Yes
- No

**26 Have you ever taken antiretroviral drugs after you had anal sex, to reduce the risk HIV infection? (also known as post-exposure prophylaxis or PEP)**

- Yes
- No

If yes, how many times in the last year?

**27 In the last 12 months, have you taken antiretroviral drugs before you had unprotected anal sex, to reduce the risk of HIV infection (also known as pre-exposure prophylaxis or PrEP)?**

- Yes
- No

If yes, where did you get the medication from?

- A clinical trial e.g. PROUD
- Sexual health clinic
- A private prescription
- The internet
- Other

**28 Are you currently taking PrEP?**

- Yes
- No

**29 In this study pack are a series of adverts and posters from the Do it London campaign. Have you seen any of these before?**

- Yes
- No (Skip to 31)

If yes where (tick all that apply)?

- On London transport (e.g. tube or buses)
- Telephone boxes/billboards
- In newspapers/magazines
- On Facebook or twitter
- In App advertising e.g. Grindr
- From a Google search
- At Pride
- In a venue
- Other...

**30 On seeing any of these specific messages/ adverts did you do any of the following? (tick all that apply)**

- Visit the website: doitlondon.org
- Share the links/messages online
- Order condoms
- Use condoms during sex
- Discuss the campaign with friends or partners
- Visit a sexual health clinic
- Think about having a HIV test
- Discuss HIV testing
- Find out where I can get an HIV test
- Have an HIV test
- None of the above

**31 In this study pack there is a picture of a Do It London condom and lube pack. Do any of the following apply to you? (tick all that apply)**

- I have seen the Do It London condom and lube packs before
- I have taken Do It London condom and lube packs
- I have used Do It London condom and/or lube
- I have not seen any Do It London condom and lube packs

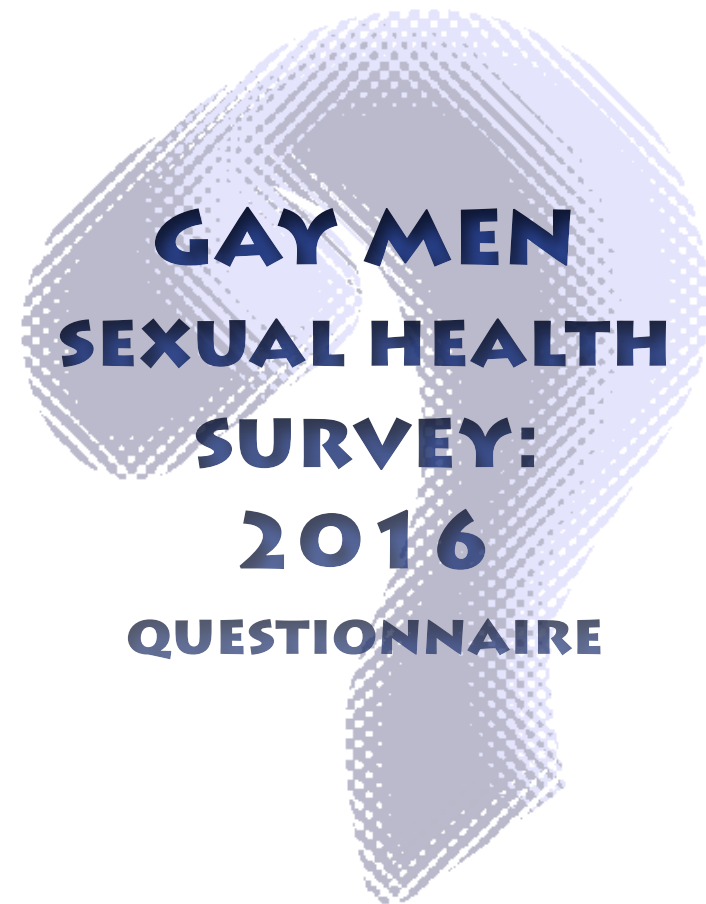

Venue

Date

**Conducted by:**

University College London and Public Health England

**Funded by:**

National Institute for Health Research School for Public Health Research and London-wide HIV Prevention Programme

Please tick, number or write as appropriate

**1 Have you already completed this questionnaire in the last three months?**

- Yes  No

If yes, where? (end here, thank you)

**2 What was your age at your last birthday?**

**3 Which of the following ethnic groups best describes you?**

- White  
 Black (African/Caribbean/British/Other)  
 South East Asian  
 Asian (Indian/Pakistani/Bangladeshi)  
 Latin American  
 Mixed  
 Other (please specify): .....

**4 In which country were you born? (please specify)**

**5 Which borough/council do you live in? (e.g. Lambeth, Hackney, Islington)**

**6 Are you in paid employment at present?**

- Yes  No

**7 How many years of full-time education have you had since you were 16?**

- None  Up to 2 years  
 2 years or more  Still in full-time education

**8 What do you believe to be your current HIV status?**

- Negative  Positive  Don't Know

**9 When did you have your last HIV test?**

- In the last 3 months  
 Between 3 and 12 months ago  
 More than a year ago  
 Over 5 years ago  
 Never had an HIV test

**10 In the last year, how many HIV tests have you had?**

**11 Where did you have your last HIV test?**

- Sexual health/GUM clinic  
 GP  
 Self sampling service (took your own specimen and sent to laboratory)  
 Self testing (tested yourself and got the result immediately)  
 Other please specify .....

**12 What was the result of your last HIV test?**

- Negative (Skip to 14)  
 Positive  
 Don't know/result not collected (Skip to 14)

**13 a) Are you currently on antiretroviral medication?**

- Yes  No

b) Your last HIV viral load was:

- Undetectable  
 Detectable  
 Don't know

**14 In the last year, have you attended a Sexual Health/GUM clinic?**

- Yes  No

**15 In the last year, have you had a STI?**

- Yes  No

If yes, which of the following STIs have you had (tick all that apply)

- LGV  
 Gonorrhoea  
 Shigella  
 Syphilis  
 Other (please specify) .....

**16 How would you describe your sexual orientation?**

- Gay/Homosexual  
 Bisexual  
 Straight/Heterosexual  
 Other (please specify).....

**17 a) In the last 12 months, how many men have you had sex with?**

b) Of these how many were once only?

**18 Have you ever had active/passive anal intercourse with a man?**

- Yes  No

**19 When was the last time you had active/passive anal intercourse with a man without a condom?**

- In the last 3 months  
 Between 3 and 12 months ago  
 More than 12 months ago

**20 a) In the last year, with how many men have you had active/passive anal intercourse?**

b) Of these how many were once only?

**21 In the last year, with how many men have you had anal intercourse without a condom?**

Of these:

a) how many were once only?

b) how many did you know had the same HIV status as you?

**22 With these partners, were you:**

- Always the active (top) partner  
 Mostly the active (top) partner  
 Equally both (versatile)  
 Mostly the passive (bottom) partner  
 Always the passive (bottom) partner

**23 How do you usually meet your sexual partners (tick all that apply)**

- In bars/clubs  Through friends  
 Gay dating apps /websites  
 In Saunas or sex on-site premises  
 Other
